# Supplementary material for: Construction of a predictive model for immunotherapy efficacy in lung squamous cell carcinoma based on the degree of tumor-infiltrating immune cells and molecular typing
Source: Springer Nature journal article supplement (doi:10.1186/s12967-022-03565-7), 2022-08-12
Supplement: MOESM1 [file 23361664]

# Supplemental figures

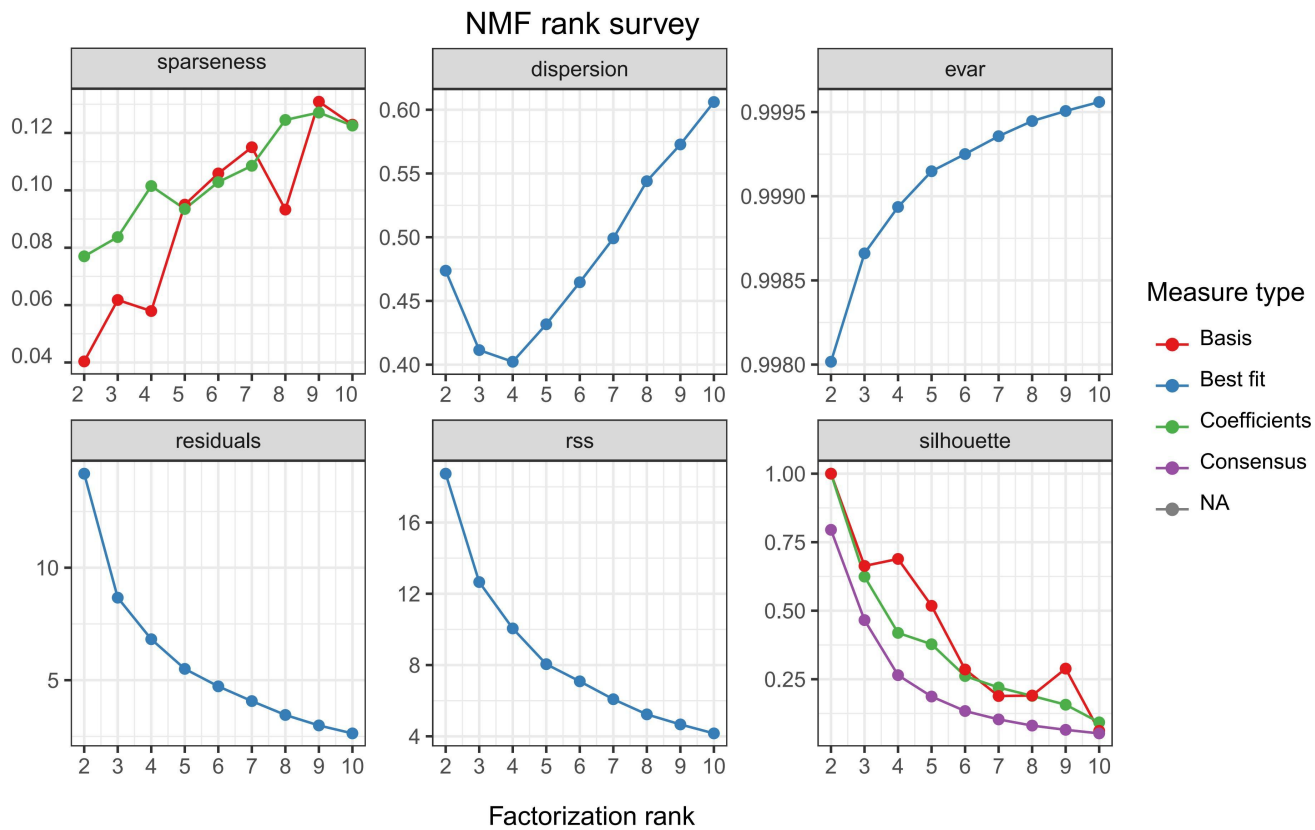

Supplementary Figure 1. The NMF rank survey at a rank of 2 to 10.

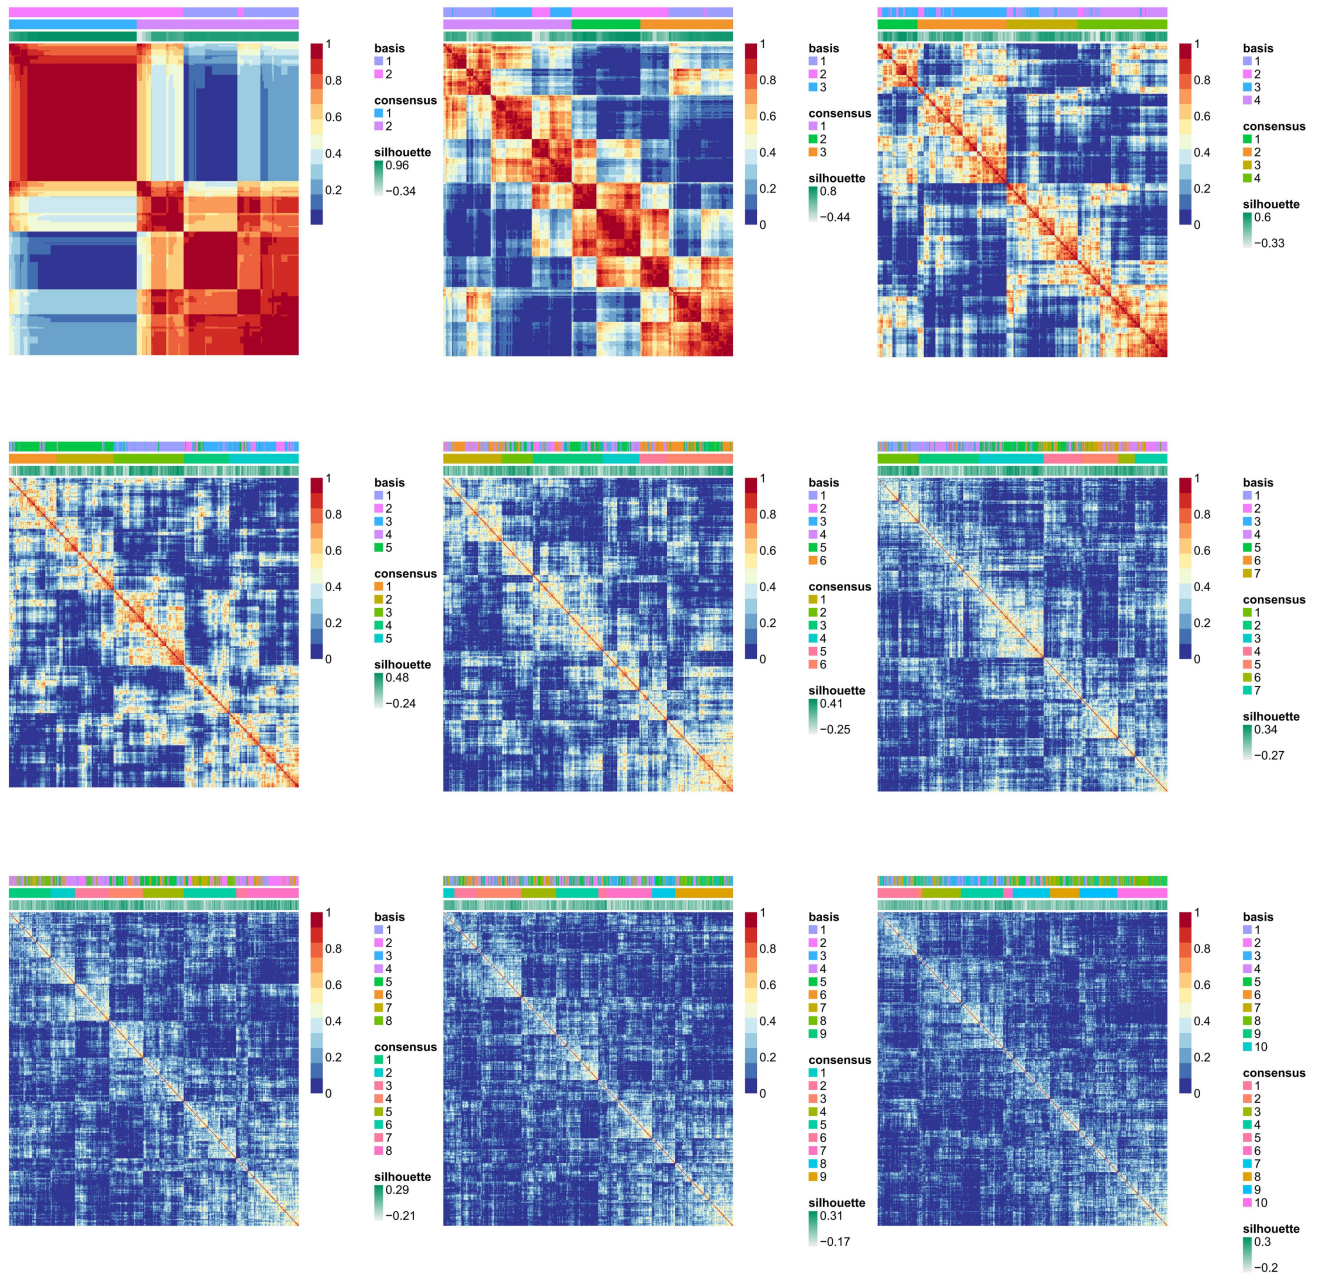

**Supplementary Figure 2.** All heatmaps of the training set with the number of clusters ranged from 2 to 10.

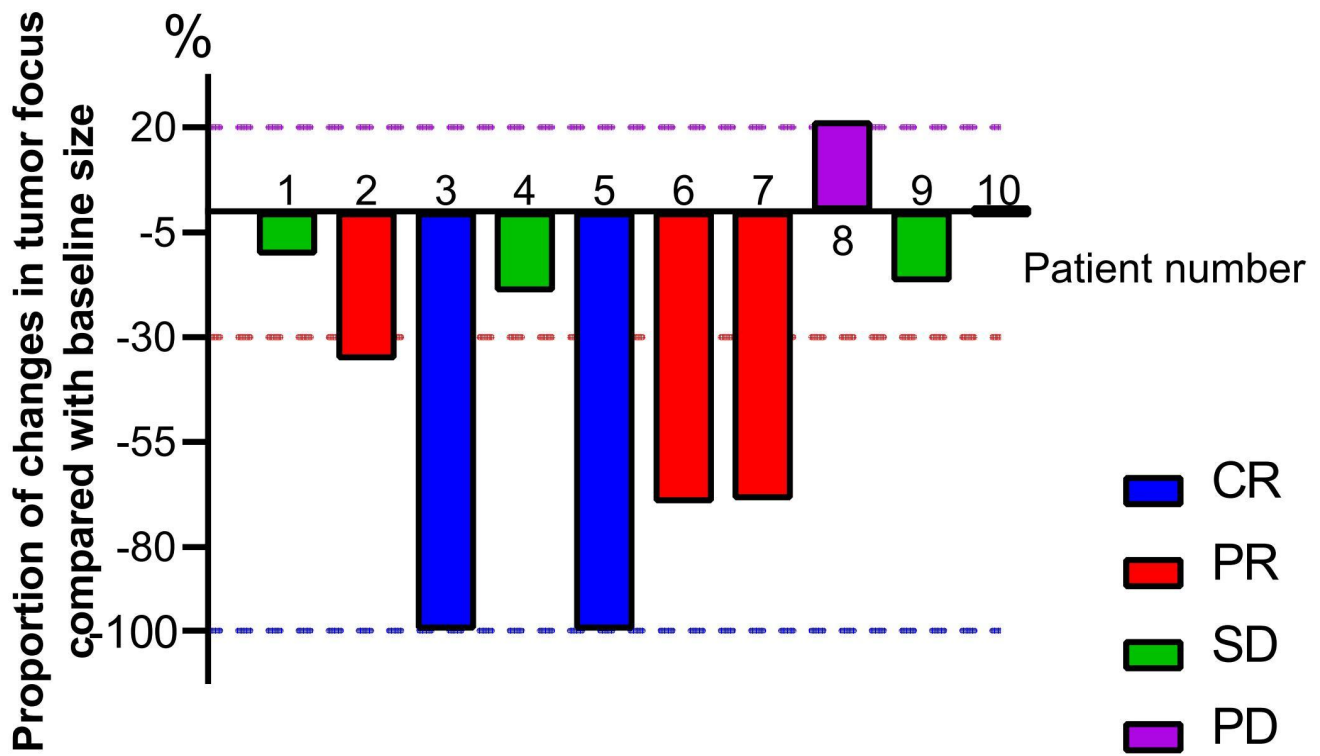

**Supplementary Figure 3.** The ten patients' best response evaluation in our independent LUSC cohort according to response evaluation criteria in solid tumours (RECIST, v1.1).

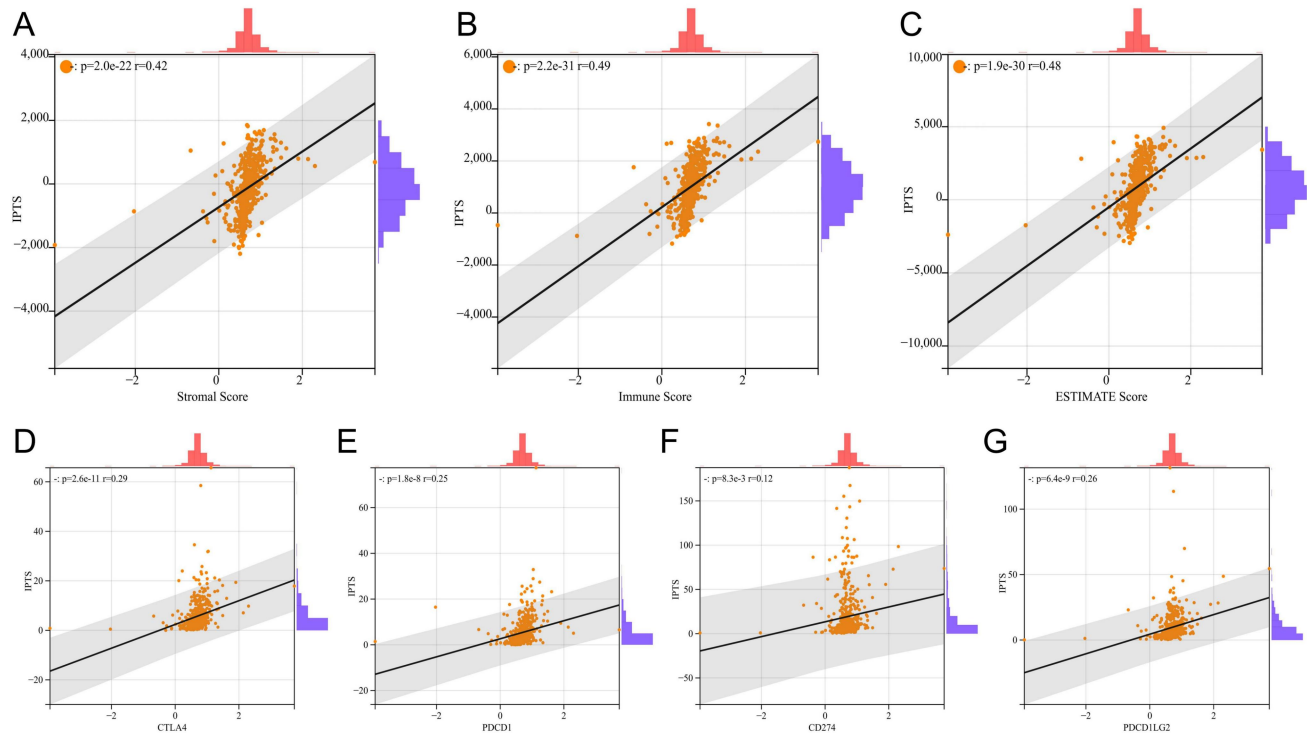

**Supplementary Figure 4.** Correlation analysis between IPTS and (A) stromal score, (B) immune score, (C) ESTIMATE score, (D) CTLA4 TPM value, (E) PDCD1 (PD-1) TPM value, (F) CD274 (PD-L1) TPM value, and (G) PDCD1LG2 (PD-L2) TPM value.
